# Supplementary material for: Thermo-rheological responsive microcapsules for time-dependent controlled release of human mesenchymal stromal cells
Source: Royal Society of Chemistry journal article supplement (doi:10.1039/c7bm00663b), 2017-01-01
Supplement: c7bm00663b1.pdf [file c7bm00663b1.pdf]

## Supporting Information

### **Thermo-rheological Responsive Microcapsules for Time-Dependent Controlled Release of Human Mesenchymal Stroma Cells**

**W.C. Mak<sup>1,2,\*</sup>, B. Magne<sup>1</sup>, K.Y. Cheung<sup>1</sup>, D. Atanasova<sup>1</sup>, M. Griffith<sup>1,3</sup>**

<sup>1</sup> Department of Clinical and Experimental Medicine, Linköping University, SE58185, Linköping, Sweden

<sup>2</sup> Biosensors and Bioelectronics Centre, Department of Physics, Chemistry and Biology, Linköping University, SE58183, Linköping, Sweden

<sup>3</sup> Dept. of Ophthalmology, University of Montreal; Maisonneuve-Rosemont Hospital Research Centre, Montreal, QC H1T 4B3, Canada.

\* Author to whom correspondence should be addressed;

E-Mail: wing.cheung.mak@liu.se; Tel.: +46-0-1328-6921.

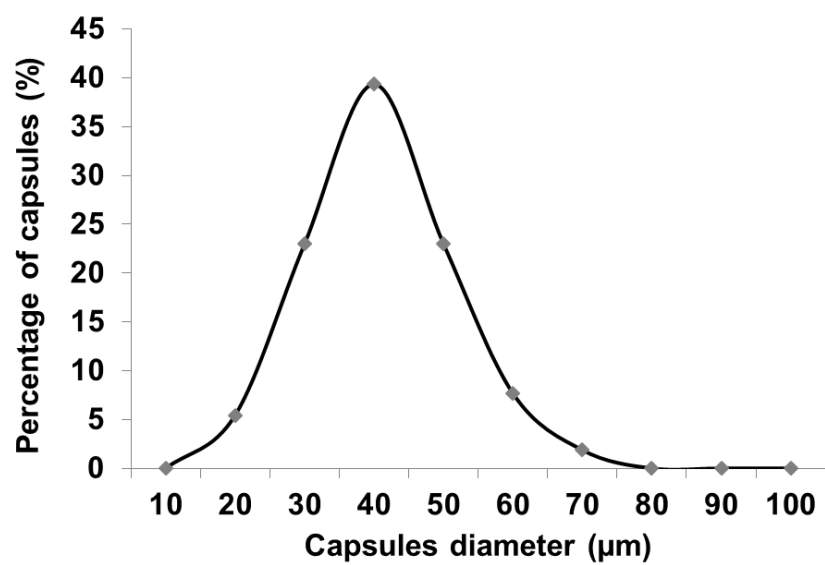

**Figure S1** Size distribution curve of the hMSC agarose-gelatin capsules.

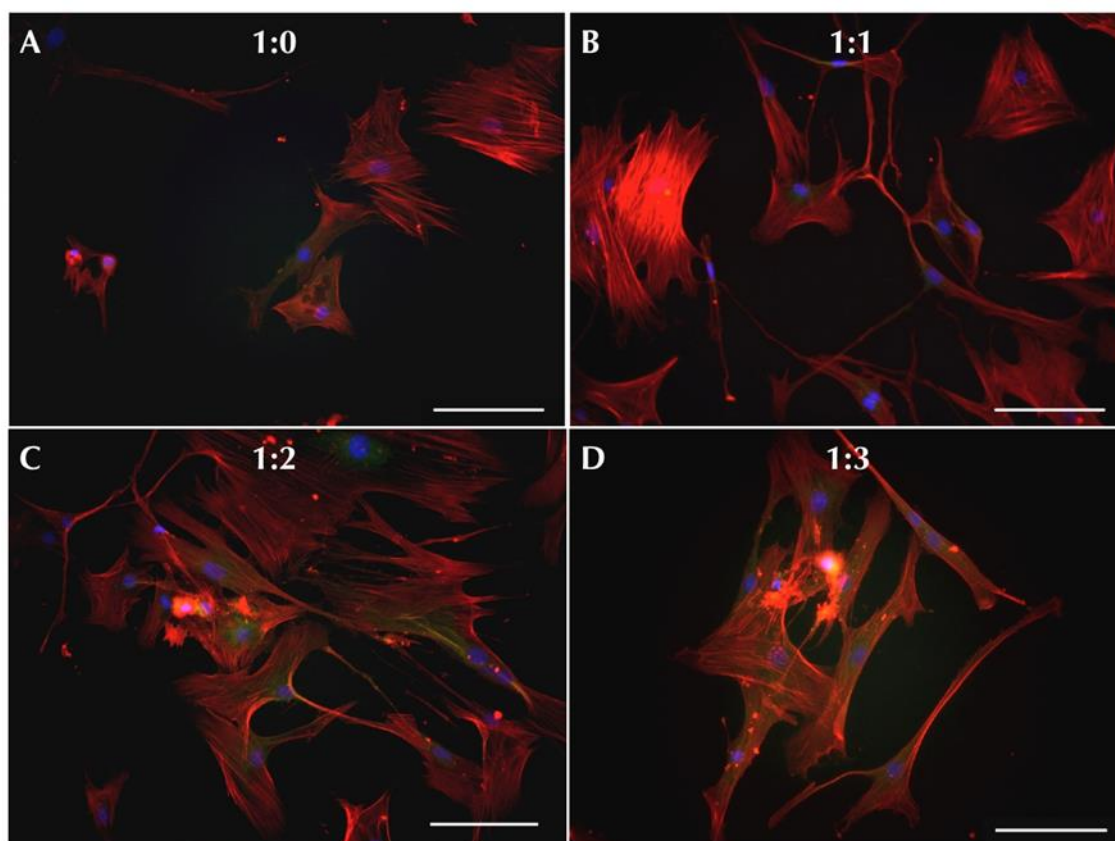

**Figure S2** Immunostaining images of the released hMSCs from **A)** 1:0, **B)** 1:1, **C)** 1:2 and **D)** 1:3 agarose-to-gelatin hydrogel capsules, respectively. Nuclei were stained in blue, F-actin was stained in red and vinculin was stained in green.

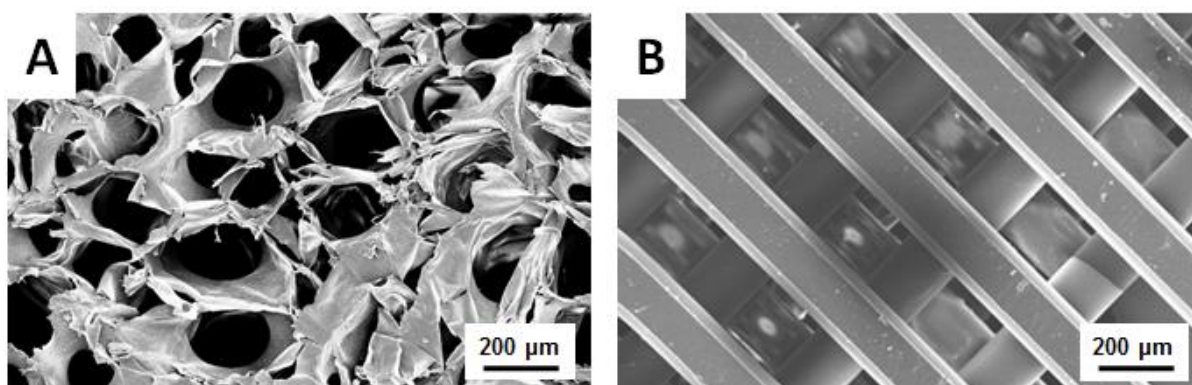

**Figure S3** Scanning electron microscope (SEM) images showing the morphology of **A)** porous collagen 3D scaffold and **B)** aligned polystyrene 3D scaffold.
